# Supplementary material
Source: PubMed Central journal article supplement (PMC5221612)
Supplement: NIHMS829054-supplement-1.pdf [file NIHMS829054-supplement-1.pdf]

# SUPPLEMENTARY MATERIAL

## **Molecular and Dynamic Mechanism Underlying Drug Resistance in Genotype 3 Hepatitis C NS3/4A Protease**

Djadé I. Soumana<sup>†</sup>, Nese Kurt Yilmaz, Akbar Ali, Kristina L. Prachanronarong, and Celia A. Schiffer\*

Department of Biochemistry and Molecular Pharmacology, University of Massachusetts Medical School, Worcester, MA 01605, USA

\***Correspondence:** [Celia.Schiffer@umassmed.edu](mailto:Celia.Schiffer@umassmed.edu)

**Table S1.** The enzyme inhibition constants ( $K_i$  values) and associated standard deviations for seven PIs were determined for four enzyme variants: GT-1a, GT-3a, GT-1a with D168Q, and GT-1a with all three active site polymorphisms (R123T/I132L/D168Q) in GT-3a.

| Inhibitor   | GT-1a*      | GT-1a–D168Q  | GT-1a–R123T<br>I132L–D168Q | GT-3a      |
|-------------|-------------|--------------|----------------------------|------------|
| Telaprevir  | 33.3 ± 3.9  | 38.5 ± 4.1   | 123 ± 26                   | 266 ± 11   |
| Boceprevir  | 33.0 ± 3.9  | 21.6 ± 2.2   | 21.0 ± 2.1                 | 71.5 ± 9.1 |
| Asunaprevir | 2.7 ± 0.5   | 193 ± 45     | 2816 ± 1407                | 2633 ± 259 |
| Danoprevir  | 1.00 ± 0.13 | 29.4 ± 3.4   | 1056 ± 376                 | 879 ± 39   |
| Vaniprevir  | 0.70 ± 0.09 | 31.9 ± 3.9   | 773 ± 293                  | 373 ± 32   |
| Grazoprevir | 0.14 ± 0.02 | 14.10 ± 0.94 | 14.1 ± 4.3                 | 33.7 ± 0.1 |
| MK-6325     | 0.10 ± 0.01 | 0.40 ± 0.04  | 33.4 ± 2.5                 | 31.1 ± 0.8 |

\*Previously measured (Ali, A.; Aydin, C.; Gildemeister, R.; Romano, K. P.; Cao, H.; Ozen, A.; Soumana, D.; Newton, A.; Petropoulos, C. J.; Huang, W.; Schiffer, C. A. *ACS Chem Biol* **2013**, *8*, 1469).

**Table S2.** Crystallographic and refinement statistics for structures of chimeric 1a3a HCV NS3/4A protease bound to inhibitors asunaprevir, danoprevir and vaniprevir (PDB IDs: 5EQS, 5EGR, 5ESB). Statistics for the highest resolution shell are given in square brackets.

|                           | Asunaprevir (ASV)       | Danoprevir (DAN)        | Vaniprevir (VAN)        |
|---------------------------|-------------------------|-------------------------|-------------------------|
| <b>Complexes</b>          | 1a/3a                   | 1a/3a                   | 1a/3a                   |
| PDB Code                  | 5EQS                    | 5EGR                    | 5ESB                    |
| Resolution range (Å)      | 25.3 – 1.8<br>[1.9–1.8] | 50.0 – 1.9<br>[2.0–1.9] | 33.3 – 2.2<br>[2.3–2.2] |
| Space Group               | P212121                 | P212121                 | P212121                 |
| Molecules in AS           | 1                       | 1                       | 1                       |
| Cell Dimensions           |                         |                         |                         |
| a                         | 39.1                    | 54.9                    | 55.1                    |
| b                         | 60.3                    | 58.4                    | 58.3                    |
| c                         | 79.6                    | 59.9                    | 59.9                    |
| β (°)                     | 90                      | 90                      | 90                      |
| Completeness (%)          | 92 [60]                 | 97 [85]                 | 94 [92]                 |
| Measured Reflections      | 69558 [2160]            | 60292 [2353]            | 39105 [1656]            |
| Unique Reflections        | 15609 [995]             | 14041 [1202]            | 9488 [536]              |
| Mean I/sigma(I)           | 10.2 [2.1]              | 7.7 [3.8]               | 17.8 [8.2]              |
| Redundancy                | 4.4 [2.2]               | 4.3 [3.7]               | 4.5 [3.1]               |
| R-merge (%)               | 9                       | 9                       | 6                       |
| RMSD in                   |                         |                         |                         |
| Bonds (Å)                 | 0.015                   | 0.012                   | 0.042                   |
| Angles (°)                | 1.6                     | 1.3                     | 1.8                     |
| Rfactor                   | 19.3                    | 16.5                    | 18.2                    |
| Rfree                     | 24.5                    | 20                      | 23.2                    |
| Wilson B-factor           | 13.4                    | 15.6                    | 12.8                    |
| Ramachandran Favored (%)  | 98                      | 98                      | 99                      |
| Ramachandran Allowed (%)  | 1.6                     | 1.6                     | 0                       |
| Ramachandran Outliers (%) | 0                       | 0                       | 0                       |
| Rotamer Outlier (%)       | 0.6                     | 0                       | 0                       |
| Clashscore                | 1.4                     | 3.7                     | 2.1                     |
| Average B-factor          | 16.3                    | 25.0                    | 21.4                    |
| Macromolecules            | 16.5                    | 25.4                    | 21.1                    |
| Ligands                   | 10.6                    | 24.0                    | 35.5                    |
| Solvent                   | 18.4                    | 28.2                    | 25.5                    |

Crystallographic statistics were calculated using the Molprobit and the Phenix Software suite.

**Table S3.** Intramolecular hydrogen bonding network. Hydrogen bonds at the protease active site in crystal structures (distance in Å) and their averaged persistence during 100 ns simulations (percent time) for HCV GT-1 and 1a3a chimeric construct.

|                 |                 | <u>Asunaprevir</u> |              | <u>Danoprevir</u> |              | <u>Vaniprevir</u> |              |
|-----------------|-----------------|--------------------|--------------|-------------------|--------------|-------------------|--------------|
|                 |                 | WT                 | 1a3a         | WT                | 1a3a         | WT                | 1a3a         |
| TYR56-Main-N    | ASP81-Main-O    | 2.1 (80.4%)        | 2.0 (18.0%)  | 2.2 (81.6%)       | >3.5 (50.1%) | 2.2 (80.4%)       | >3.5 (23.0%) |
| TYR56-Main-N    | ASP81-Side-Oδ2  | >3.5 (<20%)        | >3.5 (<20%)  | >3.5 (<20%)       | >3.5 (<20%)  | >3.5 (<20%)       | >3.5 (<20%)  |
| HIS57-Main-N    | ASP81-Side-Oδ   | 1.8 (72.5%)        | 1.9 (93.8%)  | 1.9 (72.1%)       | 1.8 (82.6%)  | 1.9 (72.5%)       | 1.8 (85.1%)  |
| HIS57-Side-Nδ1  | ASP81-Side-Oδ   | 1.6 (96.8%)        | 1.6 (89.2%)  | 1.6 (98.4%)       | 1.6 (96.4%)  | 1.6 (96.8%)       | 1.8 (97.0%)  |
| ARG123-Side-Nε  | ASP168-Side-Oδ1 | 2.7 (<20%)         | >3.5 (<20%)  | 2.4 (<20%)        | >3.5 (<20%)  | 1.9 (<20%)        | >3.5 (<20%)  |
| ARG123-Side-NH2 | ASP168-Side-Oδ1 | >3.5 (31.3%)       | >3.5 (<20%)  | >3.5 (<20%)       | >3.5 (<20%)  | 3.4 (31.3%)       | >3.5 (<20%)  |
| LYS136-Main-N   | ILE132-Main-O   | 2.3 (28.1%)        | 2.0 (25.8%)  | 2.2 (<20%)        | 2.3 (<20%)   | 2.1 (28.1%)       | 2.5 (<20%)   |
| SER138-Side-Oγ  | LYS136-Main-O   | >3.5 (10.0%)       | >3.5 (<20%)  | >3.5 (33.5%)      | >3.5 (21.2%) | >3.5 (<20%)       | >3.5 (<20%)  |
| SER138-Side-Oγ  | GLY137-Main-O   | >3.5 (<20%)        | >3.5 (<20%)  | >3.5 (<20%)       | >3.5 (<20%)  | >3.5 (<20%)       | >3.5 (<20%)  |
| GLY140-Main-N   | PHE154-Main-O   | 1.8 (90.0%)        | 1.9 (92.2%)  | 1.9 (85.4%)       | 1.8 (80.4%)  | 1.9 (90.0%)       | 1.9 (88.4%)  |
| GLY141-Main-N   | SER138-Main-O   | >3.5 (<20%)        | 2.2 (<20%)   | 2.1 (<20%)        | 2.2 (19.2%)  | 2.1 (<20%)        | 2.2 (<20%)   |
| PHE154-Main-N   | GLY141-Main-O   | 1.8 (96.0%)        | 1.8 (96.2%)  | 1.8 (96.0%)       | 1.8 (94.2%)  | 1.8 (96.0%)       | 1.7 (94.8%)  |
| ARG155-Main-N   | ASP168-Main-O   | 1.9 (81.8%)        | 1.9 (67.7%)  | 2.0 (76.1%)       | 1.9 (60.1%)  | 1.9 (81.8%)       | 1.9 (69.9%)  |
| ARG155-Side-Nε  | ASP168-Side-Oδ2 | 1.6 (99.2%)        | >3.5 (25.0%) | 1.7 (99.0%)       | >3.5 (<20%)  | 1.9 (99.2%)       | >3.5 (<20%)  |
| ARG155-Side-Nε  | GLN168-Side-Oε1 | >3.5 (<20%)        | 1.8 (47.7%)  | >3.5 (<20%)       | 2.1 (78.2%)  | >3.5 (<20%)       | 1.7 (63.7%)  |
| ARG155-Side-NH1 | GLN168-Side-Oε1 | >3.5 (<20%)        | >3.5 (<20%)  | >3.5 (<20%)       | 2.6 (<20%)   | >3.5 (<20%)       | >3.5 (<20%)  |
| ARG155-Side-NH1 | ASP168-Side-Oδ1 | 2.3 (94.2%)        | >3.5 (<20%)  | 2.4 (54.3%)       | >3.5 (<20%)  | >3.5 (94.2%)      | >3.5 (<20%)  |
| ARG155-Side-NH1 | ASP168-Side-Oδ2 | >3.5 (<20%)        | >3.5 (<20%)  | >3.5 (39.3%)      | >3.5 (<20%)  | 1.8 (<20%)        | >3.5 (<20%)  |
| ARG155-Side-NH2 | LYS80-Main-O    | 1.9 (76.1%)        | 1.7 (46.1%)  | 2.0 (81.6%)       | 2.2 (78.0%)  | 2.0 (76.1%)       | 2.1 (67.7%)  |
| ALA156-Main-N   | ASP168-Main-O   | 2.1 (50.1%)        | 2.1 (86.6%)  | 2.1 (71.5%)       | 2.2 (90.2%)  | 2.1 (50.1%)       | 1.9 (88.4%)  |
| VAL158-Main-N   | ALA166-Main-O   | 1.9 (63.3%)        | 1.9 (60.1%)  | 1.9 (82.8%)       | 1.8 (75.3%)  | 1.9 (63.3%)       | 2.2 (69.9%)  |
| LYS165-Main-N   | VAL158-Main-O   | 2.6 (<20%)         | 2.2 (19.0%)  | 2.3 (46.9%)       | 2.0 (<20%)   | 2.3 (<20%)        | 2.4 (<20%)   |
| ASP168-Main-N   | ALA156-Main-O   | 1.8 (71.3%)        | 1.8 (77.1%)  | 1.8 (85.2%)       | 1.6 (70.1%)  | 1.8 (71.3%)       | 1.6 (66.1%)  |

**Table S4.** Intermolecular hydrogen bonds between the protease and inhibitor. Hydrogen bonds between protease active site residues and the inhibitor in crystal structures (distance in Å) and their averaged persistence during 100 ns simulations (percent time) for HCV GT-1 and 1a3a chimeric construct.

|                             |         | <u>Asunaprevir</u> |              | <u>Danoprevir</u> |             | <u>Vaniprevir</u> |             |
|-----------------------------|---------|--------------------|--------------|-------------------|-------------|-------------------|-------------|
|                             |         | WT                 | 1a3a         | WT                | 1a3a        | WT                | 1a3a        |
| SER1139-Main-N              | P1' SO1 | 3.1 (48.1%)        | 2.9 (89.4%)  | 2.7 (<20%)        | 2.7 (<20%)  | 2.7 (86.6%)       | 2.8 (<20%)  |
| SER139 H                    | P1' SO1 | 1.9 (<20%)         | >3.5 (<20%)  | >3.5 (<20%)       | >3.5 (<20%) | >3.5 (<20%)       | >3.5 (<20%) |
| SER1139-Side-O $\gamma$     | P1' SO1 | 2.1 (17.4%)        | >3.5 (38.7%) | >3.5 (<20%)       | 2.0 (19.8%) | >3.5 (92.6%)      | 2.1 (20.2%) |
| GLY1137-Main-N              | P1' SO2 | 2.2 (70.1%)        | 2.2 (81.6%)  | 2.3 (83.2%)       | 2.3 (85.2%) | 2.1 (84.6%)       | 2.2 (88.2%) |
| HIP1057-Side-N $\epsilon$ 2 | P1' NH  | 2.1 (<20%)         | 2.0 (62.1%)  | 2.1 (34.9%)       | 2.2 (59.3%) | 2.0 (61.3%)       | 2.1 (58.1%) |
| GLY1137-Main-N              | P1 CO   | 2.0 (<20%)         | 2.1 (<20%)   | 2.0 (<20%)        | 2.1 (<20%)  | 2.3 (<20%)        | 2.2 (<20%)  |
| SER1138-Main-N              | P1 CO   | 2.9 (<20%)         | 3.0 (<20%)   | 2.7 (<20%)        | 2.5 (<20%)  | 2.8 (<20%)        | 2.6 (<20%)  |
| SER1139-Side-O $\gamma$     | P1 CO   | 2.6 (<20%)         | 2.8 (<20%)   | 2.6 (<20%)        | 2.5 (<20%)  | 2.7 (<20%)        | 2.5 (<20%)  |
| ARG1155-Main-O              | P1 NH   | 1.9 (57.5%)        | 2.0 (84.4%)  | 1.9 (66.7%)       | 2.0 (84.4%) | 2.0 (92.6%)       | 1.9 (83.6%) |
| ALA1157-Main-O              | P3 NH   | 1.9 (43.3%)        | 1.9 (41.9%)  | 1.9 (82.0%)       | 1.9 (79.2%) | 2.0 (88.2%)       | 2.0 (82.0%) |
| ALA1157-Main-N              | P3 CO   | 1.9 (75.1%)        | 1.9 (60.7%)  | 1.9 (85.4%)       | 2.0 (80.4%) | 1.9 (83.0%)       | 1.9 (83.0%) |

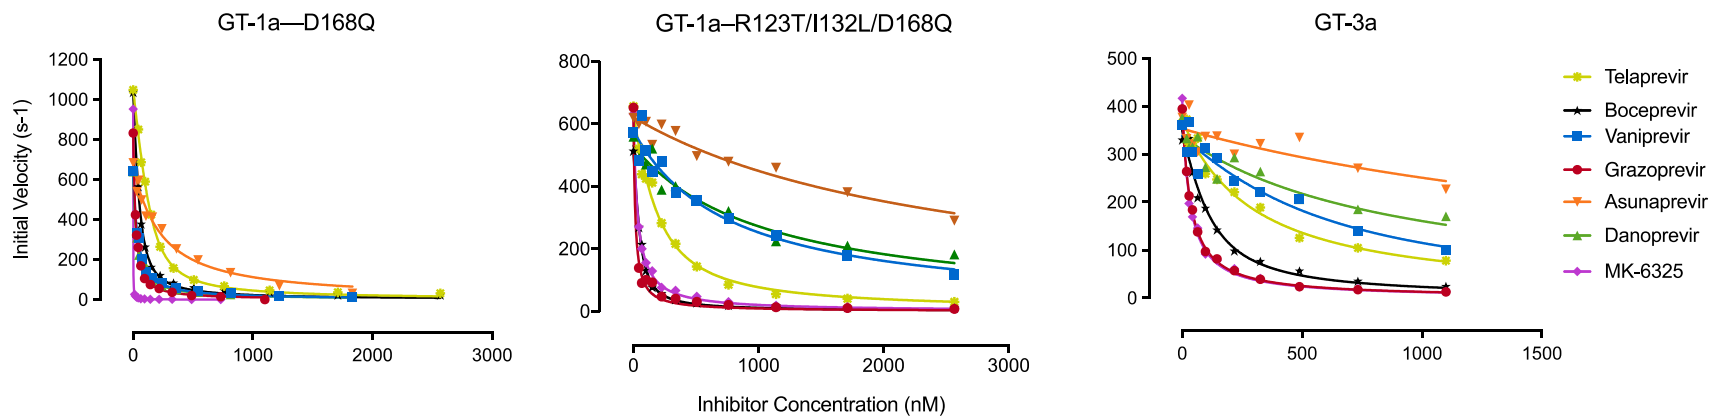

**Figure S1.** Inhibitor titration curves for representative assays used to determine the enzyme inhibition constants in Table S4 and Figure 2 of the manuscript. The  $K_i$  values for GT-1a were previously published (Ali, A.; Aydin, C.; Gildemeister, R.; Romano, K. P.; Cao, H.; Ozen, A.; Soumana, D.; Newton, A.; Petropoulos, C. J.; Huang, W.; Schiffer, C. A. *ACS Chem Biol* **2013**, *8*, 1469).

PERCENT IDENTITY MATRIX

|                 |               |               |               |                 |                 |               |
|-----------------|---------------|---------------|---------------|-----------------|-----------------|---------------|
| HCV.1a.M62321   | 100.0%        |               |               |                 |                 |               |
| HCV.2b.D10988   | 71.1%         | 100.0%        |               |                 |                 |               |
| HCV.3a.D17763   | 76.1%         | 70.6%         | 100.0%        |                 |                 |               |
| HCV.4a.DQ418788 | 80.0%         | 73.3%         | 75.0%         | 100.0%          |                 |               |
| HCV.5a.AF064490 | 82.8%         | 74.4%         | 77.8%         | 80.0%           | 100.0%          |               |
| HCV.6b.D84262   | 82.2%         | 73.3%         | 79.4%         | 81.7%           | 84.4%           | 100.0%        |
|                 | HCV.1a.M62321 | HCV.2b.D10988 | HCV.3a.D17763 | HCV.4a.DQ418788 | HCV.5a.AF064490 | HCV.6b.D84262 |

PERCENT SIMILARITY MATRIX

|                 |               |               |               |                 |                 |               |
|-----------------|---------------|---------------|---------------|-----------------|-----------------|---------------|
| HCV.1a.M62321   | 100.0%        |               |               |                 |                 |               |
| HCV.2b.D10988   | 83.3%         | 100.0%        |               |                 |                 |               |
| HCV.3a.D17763   | 87.8%         | 82.2%         | 100.0%        |                 |                 |               |
| HCV.4a.DQ418788 | 90.0%         | 86.1%         | 86.7%         | 100.0%          |                 |               |
| HCV.5a.AF064490 | 93.3%         | 87.8%         | 87.8%         | 90.6%           | 100.0%          |               |
| HCV.6b.D84262   | 92.2%         | 86.7%         | 90.6%         | 92.8%           | 92.2%           | 100.0%        |
|                 | HCV.1a.M62321 | HCV.2b.D10988 | HCV.3a.D17763 | HCV.4a.DQ418788 | HCV.5a.AF064490 | HCV.6b.D84262 |

**Figure S2.** NS3/4A protease amino acid sequence similarity across genotypes. The percent identity and similarity matrix for the protease sequences of the 6 HCV genotypes.

A)

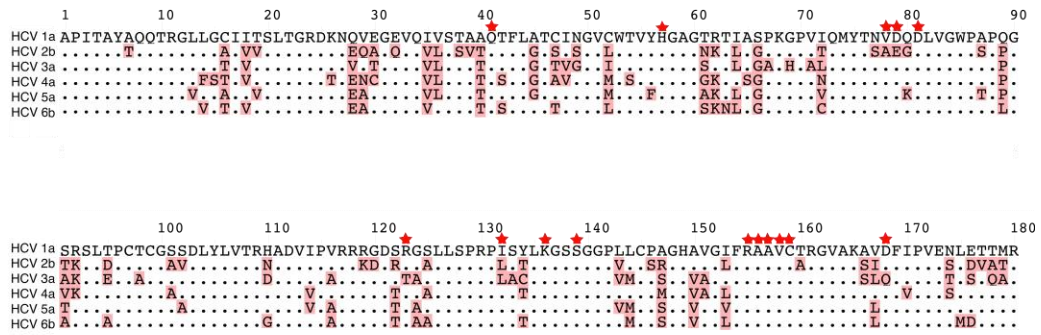

B)

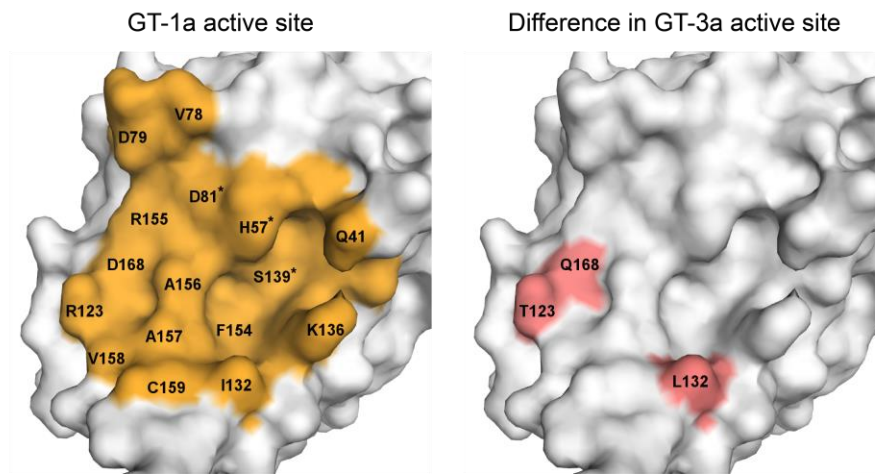

**Figure S3.** HCV NS3/4A protease polymorphisms. (A) Amino acid sequence alignment of protease from the 6 genotypes showing changes with respect to genotype 1a. The active site residues are indicated by red stars. (B) Active site residues (red stars in panel A) mapped onto the GT-1a protease structure (orange) with catalytic triad indicated by asterisks, and the polymorphisms in GT-3a active site relative to GT-1a (red).



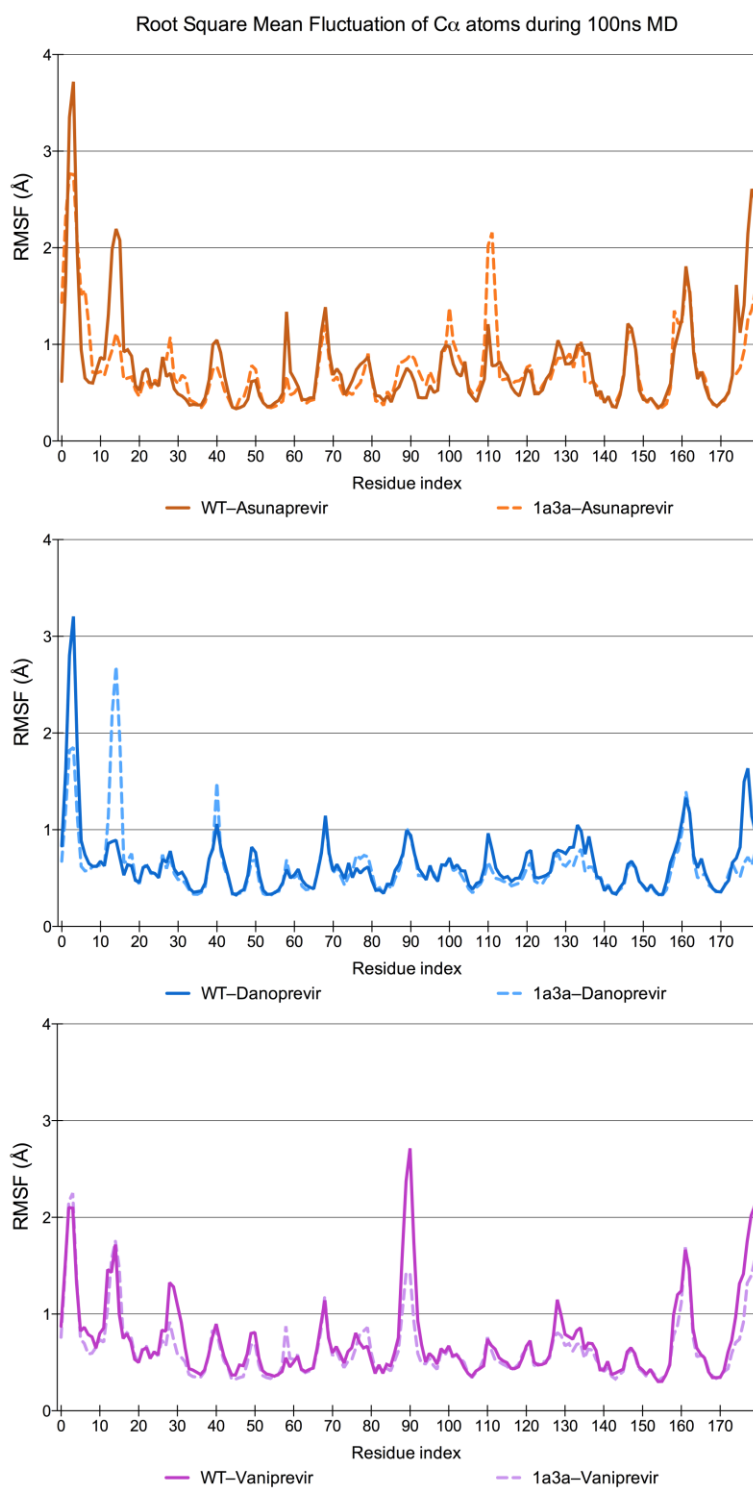

**Figure S4.** Root square mean fluctuations of protease C $\alpha$  atoms during MD simulations.

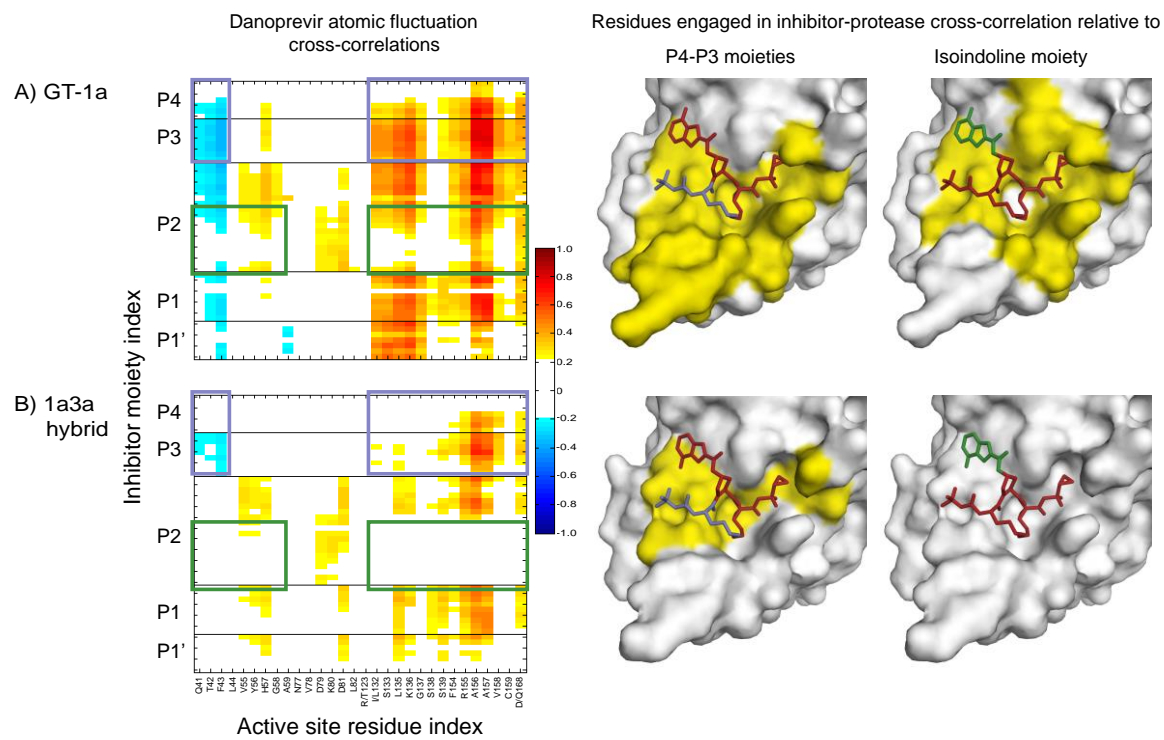

**Figure S5.** Effect of GT-3 polymorphisms on protease-danoprevir dynamic coupling. Cross-correlations between atomic fluctuations of protease active site residues and danoprevir atoms displayed on the crystal structure of (A) GT-1 and (B) chimeric 1a3a construct.

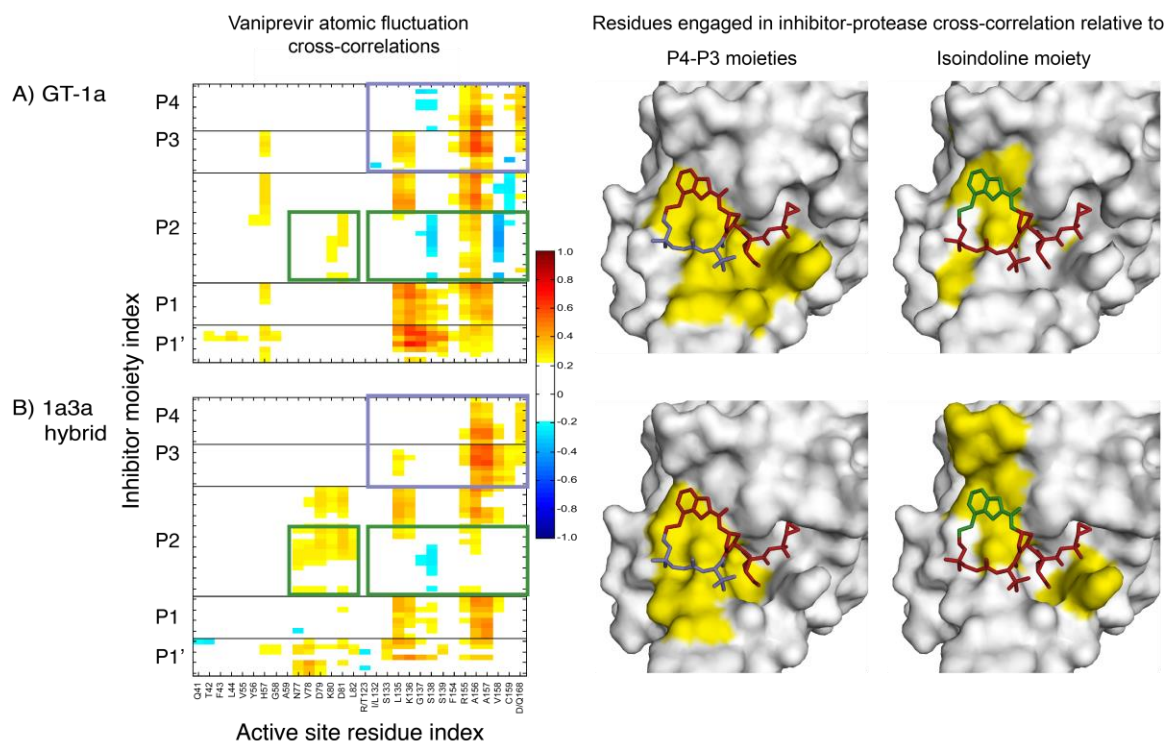

**Figure S6.** Effect of GT-3 polymorphisms on protease-vaniprevir dynamic coupling. Cross-correlations between atomic fluctuations of protease active site residues and vaniprevir atoms displayed on the crystal structure of **(A)** GT-1 and **(B)** chimeric 1a3a constructs.
